# Supplementary material for: Verbosity with retelling: narrative discourse production in temporal lobe epilepsy
Source: bioRxiv or medRxiv preprint supplement (doi:10.1101/2022.09.01.22279515), 2022-09-08
Supplement: Supplementary file [file media-2.pdf]

## Appendix B

| <b>Discourse Feature</b>         | <b>Description</b>                                                                                                                                                                                                                                                                                                                                                                                                                                                                                                                                                                                                                                                                                                                                                                                                                                                                                                                                                                                                                                                                                                                                                                                                                                                                                                                                                                          |                                |                  |                     |                        |                          |                        |                      |                      |                                |                               |                         |                         |                          |                       |                     |                           |                        |                     |                    |                           |                       |                         |                           |                           |                    |                     |                             |                             |                         |                               |                   |                        |  |
|----------------------------------|---------------------------------------------------------------------------------------------------------------------------------------------------------------------------------------------------------------------------------------------------------------------------------------------------------------------------------------------------------------------------------------------------------------------------------------------------------------------------------------------------------------------------------------------------------------------------------------------------------------------------------------------------------------------------------------------------------------------------------------------------------------------------------------------------------------------------------------------------------------------------------------------------------------------------------------------------------------------------------------------------------------------------------------------------------------------------------------------------------------------------------------------------------------------------------------------------------------------------------------------------------------------------------------------------------------------------------------------------------------------------------------------|--------------------------------|------------------|---------------------|------------------------|--------------------------|------------------------|----------------------|----------------------|--------------------------------|-------------------------------|-------------------------|-------------------------|--------------------------|-----------------------|---------------------|---------------------------|------------------------|---------------------|--------------------|---------------------------|-----------------------|-------------------------|---------------------------|---------------------------|--------------------|---------------------|-----------------------------|-----------------------------|-------------------------|-------------------------------|-------------------|------------------------|--|
| <i>“and”</i>                     | Any instance of the word “and”, the semantically least marked conjunction in place of other conjunctions. To be counted separately and then included in count of total connectives.                                                                                                                                                                                                                                                                                                                                                                                                                                                                                                                                                                                                                                                                                                                                                                                                                                                                                                                                                                                                                                                                                                                                                                                                         |                                |                  |                     |                        |                          |                        |                      |                      |                                |                               |                         |                         |                          |                       |                     |                           |                        |                     |                    |                           |                       |                         |                           |                           |                    |                     |                             |                             |                         |                               |                   |                        |  |
| <i>Abandonment</i>               | Discarding all of the interrupted utterance and replacing it entirely.                                                                                                                                                                                                                                                                                                                                                                                                                                                                                                                                                                                                                                                                                                                                                                                                                                                                                                                                                                                                                                                                                                                                                                                                                                                                                                                      |                                |                  |                     |                        |                          |                        |                      |                      |                                |                               |                         |                         |                          |                       |                     |                           |                        |                     |                    |                           |                       |                         |                           |                           |                    |                     |                             |                             |                         |                               |                   |                        |  |
| <i>Attempted/incomplete ties</i> | The number of cohesive ties which are either ambiguous or incorrect (e.g. number, gender, meaning) are tallied and the ratio to the total number of cohesive ties is calculated.                                                                                                                                                                                                                                                                                                                                                                                                                                                                                                                                                                                                                                                                                                                                                                                                                                                                                                                                                                                                                                                                                                                                                                                                            |                                |                  |                     |                        |                          |                        |                      |                      |                                |                               |                         |                         |                          |                       |                     |                           |                        |                     |                    |                           |                       |                         |                           |                           |                    |                     |                             |                             |                         |                               |                   |                        |  |
| <i>Clarity Disruptors</i>        | Composite metric includes deictic terms, circumlocution, empty phrases, and indefinite terms. Deictic terms are a word or phrase (e.g., this, that, these, those, now, then, here) that points to the time, place, or situation in which a speaker is speaking. Empty phrases are common idioms or idiosyncratic fillers not contributing any content to the discourse (e.g. “and so on and so forth”, “you know”, “like”, “but yeah”). Indefinite terms are highly non-specific nouns or terms, (e.g. “thing”, “something”, “stuff”)                                                                                                                                                                                                                                                                                                                                                                                                                                                                                                                                                                                                                                                                                                                                                                                                                                                       |                                |                  |                     |                        |                          |                        |                      |                      |                                |                               |                         |                         |                          |                       |                     |                           |                        |                     |                    |                           |                       |                         |                           |                           |                    |                     |                             |                             |                         |                               |                   |                        |  |
| <i>Clausal embedding</i>         | Count of number of embedded clauses, as either left- or right-branching. In left-branching clauses, the embedded/dependent clause interrupts the main clause (comes first), e.g., “When I saw the cars on the road, I was really frightened.” In right-branching structures, the main clause is followed by the embedded clause, e.g., “I was really frightened when I saw the cars on the road”                                                                                                                                                                                                                                                                                                                                                                                                                                                                                                                                                                                                                                                                                                                                                                                                                                                                                                                                                                                            |                                |                  |                     |                        |                          |                        |                      |                      |                                |                               |                         |                         |                          |                       |                     |                           |                        |                     |                    |                           |                       |                         |                           |                           |                    |                     |                             |                             |                         |                               |                   |                        |  |
| <i>Cohesion Disruptors</i>       | A composite metric including count of ‘ands’, other referents (missing or attempted ties), referent repetition errors - being those where a referent or its pronoun is used inconsistently for the same object or character.                                                                                                                                                                                                                                                                                                                                                                                                                                                                                                                                                                                                                                                                                                                                                                                                                                                                                                                                                                                                                                                                                                                                                                |                                |                  |                     |                        |                          |                        |                      |                      |                                |                               |                         |                         |                          |                       |                     |                           |                        |                     |                    |                           |                       |                         |                           |                           |                    |                     |                             |                             |                         |                               |                   |                        |  |
| <i>Conjunctions</i>              | A cohesive relation occurring between clauses and specifies the way in which what is to follow is systematically connected to what has gone before, e.g. but, or, so, because. (excluding and)                                                                                                                                                                                                                                                                                                                                                                                                                                                                                                                                                                                                                                                                                                                                                                                                                                                                                                                                                                                                                                                                                                                                                                                              |                                |                  |                     |                        |                          |                        |                      |                      |                                |                               |                         |                         |                          |                       |                     |                           |                        |                     |                    |                           |                       |                         |                           |                           |                    |                     |                             |                             |                         |                               |                   |                        |  |
| <i>Connectives</i>               | Incorporating instances of conjunctions and “ands”, thereby representing all sentence connections                                                                                                                                                                                                                                                                                                                                                                                                                                                                                                                                                                                                                                                                                                                                                                                                                                                                                                                                                                                                                                                                                                                                                                                                                                                                                           |                                |                  |                     |                        |                          |                        |                      |                      |                                |                               |                         |                         |                          |                       |                     |                           |                        |                     |                    |                           |                       |                         |                           |                           |                    |                     |                             |                             |                         |                               |                   |                        |  |
| <i>Core propositions</i>         | Total number of novel core content units as per Joannette and colleagues (1986) <table border="1" style="width: 100%; border-collapse: collapse;"> <tbody> <tr> <td>1. (ARRIVE, COWBOY)</td> <td>12. (SMALL, BOY)</td> <td>23. (TO, P21, HAND)</td> </tr> <tr> <td>2. (ON, COWBOY, HORSE)</td> <td>13. (HOLD, BOY, HORSE 2)</td> <td>24. (OF, HAND, COWBOY)</td> </tr> <tr> <td>3. (IN, P1, VILLAGE)</td> <td>14. (SMALL, HORSE 2)</td> <td>25. (INSTEAD OF, P21, HORSE 1)</td> </tr> <tr> <td>4. (GET OFF, COWBOY, HORSE 1)</td> <td>15. (OF, HORSE 2, WOOD)</td> <td>26. (RUN AWAY, HORSE 1)</td> </tr> <tr> <td>5. (OF, HORSE 1, COWBOY)</td> <td>16. (PLAY TRICK, BOY)</td> <td>27. (RUN AWAY, BOY)</td> </tr> <tr> <td>6. (TIE, COWBOY, HORSE 1)</td> <td>17. (CUT, BOY, BRIDLE)</td> <td>28. (AND, P27, P26)</td> </tr> <tr> <td>7. (TIRED, COWBOY)</td> <td>18. (OF, BRIDLE, HORSE 1)</td> <td>29. (WAKE UP, COWBOY)</td> </tr> <tr> <td>8. (SIT, COWBOY, BENCH)</td> <td>19. (WITH, P17, SCISSORS)</td> <td>30. (NOTICE, COWBOY, P31)</td> </tr> <tr> <td>9. (SLEEP, COWBOY)</td> <td>20. (SLEEP, COWBOY)</td> <td>31. (HAVE, COWBOY, HORSE 2)</td> </tr> <tr> <td>10. (HOLD, COWBOY, HORSE 1)</td> <td>21. (TIE, BOY, HORSE 2)</td> <td>32. (OVERTURN, COWBOY, BENCH)</td> </tr> <tr> <td>11. (ARRIVE, BOY)</td> <td>22. (OF, HORSE 2, BOY)</td> <td></td> </tr> </tbody> </table> | 1. (ARRIVE, COWBOY)            | 12. (SMALL, BOY) | 23. (TO, P21, HAND) | 2. (ON, COWBOY, HORSE) | 13. (HOLD, BOY, HORSE 2) | 24. (OF, HAND, COWBOY) | 3. (IN, P1, VILLAGE) | 14. (SMALL, HORSE 2) | 25. (INSTEAD OF, P21, HORSE 1) | 4. (GET OFF, COWBOY, HORSE 1) | 15. (OF, HORSE 2, WOOD) | 26. (RUN AWAY, HORSE 1) | 5. (OF, HORSE 1, COWBOY) | 16. (PLAY TRICK, BOY) | 27. (RUN AWAY, BOY) | 6. (TIE, COWBOY, HORSE 1) | 17. (CUT, BOY, BRIDLE) | 28. (AND, P27, P26) | 7. (TIRED, COWBOY) | 18. (OF, BRIDLE, HORSE 1) | 29. (WAKE UP, COWBOY) | 8. (SIT, COWBOY, BENCH) | 19. (WITH, P17, SCISSORS) | 30. (NOTICE, COWBOY, P31) | 9. (SLEEP, COWBOY) | 20. (SLEEP, COWBOY) | 31. (HAVE, COWBOY, HORSE 2) | 10. (HOLD, COWBOY, HORSE 1) | 21. (TIE, BOY, HORSE 2) | 32. (OVERTURN, COWBOY, BENCH) | 11. (ARRIVE, BOY) | 22. (OF, HORSE 2, BOY) |  |
| 1. (ARRIVE, COWBOY)              | 12. (SMALL, BOY)                                                                                                                                                                                                                                                                                                                                                                                                                                                                                                                                                                                                                                                                                                                                                                                                                                                                                                                                                                                                                                                                                                                                                                                                                                                                                                                                                                            | 23. (TO, P21, HAND)            |                  |                     |                        |                          |                        |                      |                      |                                |                               |                         |                         |                          |                       |                     |                           |                        |                     |                    |                           |                       |                         |                           |                           |                    |                     |                             |                             |                         |                               |                   |                        |  |
| 2. (ON, COWBOY, HORSE)           | 13. (HOLD, BOY, HORSE 2)                                                                                                                                                                                                                                                                                                                                                                                                                                                                                                                                                                                                                                                                                                                                                                                                                                                                                                                                                                                                                                                                                                                                                                                                                                                                                                                                                                    | 24. (OF, HAND, COWBOY)         |                  |                     |                        |                          |                        |                      |                      |                                |                               |                         |                         |                          |                       |                     |                           |                        |                     |                    |                           |                       |                         |                           |                           |                    |                     |                             |                             |                         |                               |                   |                        |  |
| 3. (IN, P1, VILLAGE)             | 14. (SMALL, HORSE 2)                                                                                                                                                                                                                                                                                                                                                                                                                                                                                                                                                                                                                                                                                                                                                                                                                                                                                                                                                                                                                                                                                                                                                                                                                                                                                                                                                                        | 25. (INSTEAD OF, P21, HORSE 1) |                  |                     |                        |                          |                        |                      |                      |                                |                               |                         |                         |                          |                       |                     |                           |                        |                     |                    |                           |                       |                         |                           |                           |                    |                     |                             |                             |                         |                               |                   |                        |  |
| 4. (GET OFF, COWBOY, HORSE 1)    | 15. (OF, HORSE 2, WOOD)                                                                                                                                                                                                                                                                                                                                                                                                                                                                                                                                                                                                                                                                                                                                                                                                                                                                                                                                                                                                                                                                                                                                                                                                                                                                                                                                                                     | 26. (RUN AWAY, HORSE 1)        |                  |                     |                        |                          |                        |                      |                      |                                |                               |                         |                         |                          |                       |                     |                           |                        |                     |                    |                           |                       |                         |                           |                           |                    |                     |                             |                             |                         |                               |                   |                        |  |
| 5. (OF, HORSE 1, COWBOY)         | 16. (PLAY TRICK, BOY)                                                                                                                                                                                                                                                                                                                                                                                                                                                                                                                                                                                                                                                                                                                                                                                                                                                                                                                                                                                                                                                                                                                                                                                                                                                                                                                                                                       | 27. (RUN AWAY, BOY)            |                  |                     |                        |                          |                        |                      |                      |                                |                               |                         |                         |                          |                       |                     |                           |                        |                     |                    |                           |                       |                         |                           |                           |                    |                     |                             |                             |                         |                               |                   |                        |  |
| 6. (TIE, COWBOY, HORSE 1)        | 17. (CUT, BOY, BRIDLE)                                                                                                                                                                                                                                                                                                                                                                                                                                                                                                                                                                                                                                                                                                                                                                                                                                                                                                                                                                                                                                                                                                                                                                                                                                                                                                                                                                      | 28. (AND, P27, P26)            |                  |                     |                        |                          |                        |                      |                      |                                |                               |                         |                         |                          |                       |                     |                           |                        |                     |                    |                           |                       |                         |                           |                           |                    |                     |                             |                             |                         |                               |                   |                        |  |
| 7. (TIRED, COWBOY)               | 18. (OF, BRIDLE, HORSE 1)                                                                                                                                                                                                                                                                                                                                                                                                                                                                                                                                                                                                                                                                                                                                                                                                                                                                                                                                                                                                                                                                                                                                                                                                                                                                                                                                                                   | 29. (WAKE UP, COWBOY)          |                  |                     |                        |                          |                        |                      |                      |                                |                               |                         |                         |                          |                       |                     |                           |                        |                     |                    |                           |                       |                         |                           |                           |                    |                     |                             |                             |                         |                               |                   |                        |  |
| 8. (SIT, COWBOY, BENCH)          | 19. (WITH, P17, SCISSORS)                                                                                                                                                                                                                                                                                                                                                                                                                                                                                                                                                                                                                                                                                                                                                                                                                                                                                                                                                                                                                                                                                                                                                                                                                                                                                                                                                                   | 30. (NOTICE, COWBOY, P31)      |                  |                     |                        |                          |                        |                      |                      |                                |                               |                         |                         |                          |                       |                     |                           |                        |                     |                    |                           |                       |                         |                           |                           |                    |                     |                             |                             |                         |                               |                   |                        |  |
| 9. (SLEEP, COWBOY)               | 20. (SLEEP, COWBOY)                                                                                                                                                                                                                                                                                                                                                                                                                                                                                                                                                                                                                                                                                                                                                                                                                                                                                                                                                                                                                                                                                                                                                                                                                                                                                                                                                                         | 31. (HAVE, COWBOY, HORSE 2)    |                  |                     |                        |                          |                        |                      |                      |                                |                               |                         |                         |                          |                       |                     |                           |                        |                     |                    |                           |                       |                         |                           |                           |                    |                     |                             |                             |                         |                               |                   |                        |  |
| 10. (HOLD, COWBOY, HORSE 1)      | 21. (TIE, BOY, HORSE 2)                                                                                                                                                                                                                                                                                                                                                                                                                                                                                                                                                                                                                                                                                                                                                                                                                                                                                                                                                                                                                                                                                                                                                                                                                                                                                                                                                                     | 32. (OVERTURN, COWBOY, BENCH)  |                  |                     |                        |                          |                        |                      |                      |                                |                               |                         |                         |                          |                       |                     |                           |                        |                     |                    |                           |                       |                         |                           |                           |                    |                     |                             |                             |                         |                               |                   |                        |  |
| 11. (ARRIVE, BOY)                | 22. (OF, HORSE 2, BOY)                                                                                                                                                                                                                                                                                                                                                                                                                                                                                                                                                                                                                                                                                                                                                                                                                                                                                                                                                                                                                                                                                                                                                                                                                                                                                                                                                                      |                                |                  |                     |                        |                          |                        |                      |                      |                                |                               |                         |                         |                          |                       |                     |                           |                        |                     |                    |                           |                       |                         |                           |                           |                    |                     |                             |                             |                         |                               |                   |                        |  |
| <i>Deictic terms</i>             | a word or phrase (such as this, that, these, those, now, then, here) that points to the time, place, or situation in which a speaker is speaking (excludes the use of “that” as a relative pronoun).                                                                                                                                                                                                                                                                                                                                                                                                                                                                                                                                                                                                                                                                                                                                                                                                                                                                                                                                                                                                                                                                                                                                                                                        |                                |                  |                     |                        |                          |                        |                      |                      |                                |                               |                         |                         |                          |                       |                     |                           |                        |                     |                    |                           |                       |                         |                           |                           |                    |                     |                             |                             |                         |                               |                   |                        |  |
| <i>Empty phrases</i>             | Common idioms or idiosyncratic fillers not contributing any content to the discourse (e.g., “and so on and so forth”, “you know”, “like”)                                                                                                                                                                                                                                                                                                                                                                                                                                                                                                                                                                                                                                                                                                                                                                                                                                                                                                                                                                                                                                                                                                                                                                                                                                                   |                                |                  |                     |                        |                          |                        |                      |                      |                                |                               |                         |                         |                          |                       |                     |                           |                        |                     |                    |                           |                       |                         |                           |                           |                    |                     |                             |                             |                         |                               |                   |                        |  |
| <i>False start</i>               | A phrase or sentence which is revised to modify, correct or clarify what the speaker has already said and may include an editing expression such as “I mean”, etc. E.g “I went to town on Thursday I mean on Friday”. Includes abandonments, incomplete mazes, word-choice corrections, part-word productions, and repetitions.                                                                                                                                                                                                                                                                                                                                                                                                                                                                                                                                                                                                                                                                                                                                                                                                                                                                                                                                                                                                                                                             |                                |                  |                     |                        |                          |                        |                      |                      |                                |                               |                         |                         |                          |                       |                     |                           |                        |                     |                    |                           |                       |                         |                           |                           |                    |                     |                             |                             |                         |                               |                   |                        |  |
| <i>Filler</i>                    | Any aspect of speech which is non-communicative and serves no addition to content (e.g., “um”, “ah”, “er”)                                                                                                                                                                                                                                                                                                                                                                                                                                                                                                                                                                                                                                                                                                                                                                                                                                                                                                                                                                                                                                                                                                                                                                                                                                                                                  |                                |                  |                     |                        |                          |                        |                      |                      |                                |                               |                         |                         |                          |                       |                     |                           |                        |                     |                    |                           |                       |                         |                           |                           |                    |                     |                             |                             |                         |                               |                   |                        |  |
| <i>Fluency disruptors</i>        | Composite metric of clarity disruptors, false starts and repairs (including abandonment, incomplete mazes, part-word production, repetitions), hesitations (pauses and fillers) and word finding difficulties                                                                                                                                                                                                                                                                                                                                                                                                                                                                                                                                                                                                                                                                                                                                                                                                                                                                                                                                                                                                                                                                                                                                                                               |                                |                  |                     |                        |                          |                        |                      |                      |                                |                               |                         |                         |                          |                       |                     |                           |                        |                     |                    |                           |                       |                         |                           |                           |                    |                     |                             |                             |                         |                               |                   |                        |  |
| <i>Incomplete mazes</i>          | A phrase or sentence which is begun but abandoned, leaving the thought incomplete and signifying a shift in thought, e.g. “After going home.. well first I went shopping”                                                                                                                                                                                                                                                                                                                                                                                                                                                                                                                                                                                                                                                                                                                                                                                                                                                                                                                                                                                                                                                                                                                                                                                                                   |                                |                  |                     |                        |                          |                        |                      |                      |                                |                               |                         |                         |                          |                       |                     |                           |                        |                     |                    |                           |                       |                         |                           |                           |                    |                     |                             |                             |                         |                               |                   |                        |  |
| <i>Indefinite words/terms</i>    | Highly non-specific nouns (e.g., “thing”, “something”, “stuff”)                                                                                                                                                                                                                                                                                                                                                                                                                                                                                                                                                                                                                                                                                                                                                                                                                                                                                                                                                                                                                                                                                                                                                                                                                                                                                                                             |                                |                  |                     |                        |                          |                        |                      |                      |                                |                               |                         |                         |                          |                       |                     |                           |                        |                     |                    |                           |                       |                         |                           |                           |                    |                     |                             |                             |                         |                               |                   |                        |  |

|                                           |                                                                                                                                                                                                                                                                                                                                                           |
|-------------------------------------------|-----------------------------------------------------------------------------------------------------------------------------------------------------------------------------------------------------------------------------------------------------------------------------------------------------------------------------------------------------------|
| <i>Non-progression error</i>              | Instances where information that has already been presented is repeated or redundant, or where content is irrelevant to the task goals                                                                                                                                                                                                                    |
| <i>Other referents</i>                    | A composite metric including attempted/incomplete ties and missing referents - being those where the referent or subject is absent or omitted from the statement.                                                                                                                                                                                         |
| <i>Part-word production</i>               | The production or repetition of syllables and sounds within a word, e.g. "He went ho- home first"                                                                                                                                                                                                                                                         |
| <i>Pause (unfilled)</i>                   | Any duration of silence (>250ms)                                                                                                                                                                                                                                                                                                                          |
| <i>Pause duration</i>                     | Collective length of time spent pausing                                                                                                                                                                                                                                                                                                                   |
| <i>Postponement</i>                       | Interrupting an utterance so additional material may be inserted, with a return to the original utterance later on, e.g. "and they thought- there was pig's blood in it and they thought that there was somebody hurt. But it was the pig".                                                                                                               |
| <i>Production rate</i>                    | Words spoken per second                                                                                                                                                                                                                                                                                                                                   |
| <i>Reference correction</i>               | Replacing a noun or pronoun so as to specify a referent more exactly, for the purpose of disambiguation, e.g. "Gerald and Kevin threw a snowball at me and I got him right in the face- Kevin right in the face", or where a pronominal reference may be replaced by a noun phrase, e.g. "we went to- uh me and Jess went to Aunt Carol's"                |
| <i>Referential ties</i>                   | Instances where an individual refers to another object/person using pronouns. Code anaphoric and cataphoric referential ties separately. Anaphoric = noun usage precedes pronoun introduction. Cataphoric = pronoun usage precedes introduction of noun.                                                                                                  |
| <i>Repetition (single and multi-word)</i> | Instances of repetition of a previous word or words of the utterance before carrying on, e.g. "I have- I have new shoes on". Single vs multi-word to be coded separately, as well as utterance-initial and mid-utterance occurrences.                                                                                                                     |
| <i>Repetition errors</i>                  | Errors associated with the semantic relatedness of different parts of a narrative, and are marked by the inconsistent used of pronouns, or referents for the same object or character. These correspond with instances of inconsistent referential ties.                                                                                                  |
| <i>Sample length</i>                      | Count of words spoken for a given task or trial. Includes all completed words uttered (excluding part words and fillers, although including repetitions)                                                                                                                                                                                                  |
| <i>Spontaneous duration</i>               | Length of time producing output for a given task or trial                                                                                                                                                                                                                                                                                                 |
| <i>Syntactic complexity</i>               | Composite metric: clausal embedding, postponement, conjunctions, syntactic corrections                                                                                                                                                                                                                                                                    |
| <i>Syntactic correction</i>               | Refers to instances of replacing a content word with the same word of a different morphological form, rearranging word order, inserting appropriate function words, altering noun-pronoun agreement, or any other repair that improves the syntactic quality of the utterance. E.g. "He felt like there's bells in his ears and he can't- couldn't hear". |
| <i>Syntactic simplicity</i>               | Composite metric: missing referents, 'ands', and syntax errors                                                                                                                                                                                                                                                                                            |
| <i>Syntax error</i>                       | Count of errors to syntax including incomplete utterances, missing definite article, subject, or referent                                                                                                                                                                                                                                                 |
| <i>Total statements</i>                   | Number of statements, where single statement refers to a predicate and its corresponding arguments                                                                                                                                                                                                                                                        |
| <i>Word choice correction</i>             | Replacing a content word with another of the same morphological form (e.g., "yesterday I leant-borrowed my friend's car")                                                                                                                                                                                                                                 |
| <i>Word finding difficulties</i>          | Instances where an individual is unable to produce the correct word, and either uses circumlocutory language or non-specific language to attempt to describe it                                                                                                                                                                                           |
