# Supplementary material for: Verbosity with retelling: narrative discourse production in temporal lobe epilepsy
Source: bioRxiv or medRxiv preprint supplement (doi:10.1101/2022.09.01.22279515), 2022-09-08
Supplement: Supplementary file [file media-3.pdf]

Appendix C

Table 1

Sample characteristics for neuropsychological variables

| Variable                                                 | Control<br>(n =14)      |        | TLE<br>(n =15)          |        | p        | r    |
|----------------------------------------------------------|-------------------------|--------|-------------------------|--------|----------|------|
|                                                          | Median (Q1,Q3)          | Range  | Median (Q1,Q3)          | Range  |          |      |
| TOPF <sup>a</sup>                                        | 0.75 (-0.02, 1.33)      | 2.25   | 0.25 (-0.67, 0.67)      | 3.00   | 0.06     | 0.41 |
| WASI-II <sup>a</sup> Matrix Reasoning                    | 0.40 (0.00, 0.92)       | 6.50   | 0.00 (-0.33, 0.55)      | 4.50   | 0.40     | 0.19 |
| WASI-II <sup>a</sup> Vocabulary                          | 1.00 (-0.18, 1.25)      | 3.50   | 0.55 (0.14, 0.67)       | 3.67   | 0.20     | 0.29 |
| WASI-II <sup>a</sup> FSIQ                                | 0.61 (-0.25, 0.75)      | 3.17   | 0.25 (-0.42, 0.55)      | 4.50   | 0.26     | 0.25 |
| WAIS-IV Digits Forward <sup>a</sup>                      | 0.34 (-0.67, 0.92)      | 3.67   | -0.33 (-0.33, 0.17)     | 2.33   | 0.47     | 0.16 |
| WAIS-IV Digits Backward <sup>a</sup>                     | 0.00 (-0.67, 0.33)      | 3.34   | 0.00 (-0.33, 0.50)      | 2.66   | 0.98     | 0.01 |
| WMS-IV Logical Memory I <sup>a</sup>                     | 0.67 (-0.16, 1.33)      | 4.00   | 0.33 (-0.17, 1.00)      | 2.33   | 0.58     | 0.12 |
| WMS-IV Logical Memory II <sup>a</sup>                    | 1.00 (0.00, 1.00)       | 3.66   | 0.33 (-0.33, 1.00)      | 2.67   | 0.48     | 0.16 |
| RAVLT <sup>a</sup> Total <sup>a</sup>                    | 0.59 (-0.09, 1.52)      | 3.57   | 0.18 (-0.15, 1.15)      | 3.01   | 0.62     | 0.11 |
| RAVLT <sup>a</sup> Post-Interference Recall <sup>a</sup> | 0.22 (-0.58, 1.10)      | 3.01   | 0.22 (-0.86, 0.89)      | 3.76   | 0.65     | 0.10 |
| RAVLT <sup>a</sup> Delayed Recall <sup>a</sup>           | 0.28 (-0.46, 1.26)      | 4.34   | 0.32 (-0.77, 0.69)      | 3.91   | 0.65     | 0.10 |
| WMS-R Easy <sup>^</sup>                                  | 12.00 (11.00, 12.00)    | 3.00   | 11.00 (10.00, 11.50)    | 3.00   | 0.18     | 0.28 |
| WMS-R Hard <sup>^</sup>                                  | 8.50 (6.25, 10.00)      | 10.00  | 7.00 (6.00, 8.50)       | 9.00   | 0.21     | 0.28 |
| WMS-R Easy Delay <sup>^</sup>                            | 4.00 (4.00, 4.00)       | 0.00   | 4.00 (4.00, 4.00)       | 1.00   | 0.37     | 0.07 |
| WMS-R Hard Delay <sup>^</sup>                            | 4.00 (3.25, 4.00)       | 4.00   | 4.00 (3.00, 4.00)       | 2.00   | 0.60     | 0.10 |
| Victoria Stroop <sup>a</sup> Dots <sup>a</sup>           | -0.83 (-1.25, -0.33)    | 2.33   | -1.33 (-1.33, -1.00)    | 3.34   | 0.12     | 0.34 |
| Victoria Stroop <sup>a</sup> Words <sup>a</sup>          | -0.50 (-0.92, -0.33)    | 1.67   | -0.67 (-1.33, -0.33)    | 2.33   | 0.31     | 0.22 |
| Victoria Stroop <sup>a</sup> Colour <sup>a</sup>         | 0.00 (-0.92, 0.67)      | 4.00   | 0.00 (-0.67, 0.33)      | 2.00   | 0.60     | 0.12 |
| Victoria Stroop <sup>a</sup> Interference <sup>a</sup>   | 0.83 (-0.83, 1.00)      | 3.33   | 1.00 (0.50, 1.33)       | 2.00   | 0.41     | 0.18 |
| BNT <sup>a</sup> Total <sup>a</sup>                      | -0.05 (-0.67, 0.55)     | 3.03   | -0.74 (-1.65, 0.13)     | 3.84   | 0.12     | 0.35 |
| BNT <sup>a</sup> TOT States <sup>^a</sup>                | 17.00 (13.75, 23.50)    | 22.00  | 24.00 (21.00, 27.00)    | 17.00  | 0.02*    | 0.48 |
| BNT <sup>a</sup> Proportion TOT <sup>^a</sup>            | 0.28 (0.23, 0.40)       | 0.37   | 0.40 (0.35, 0.44)       | 0.20   | 0.08     | 0.39 |
| OLR (COWAT) <sup>a</sup>                                 | -0.53 (-0.98, -0.04)    | 4.01   | -1.17 (-1.58, 0.16)     | 4.29   | 0.29     | 0.23 |
| Animals <sup>a</sup>                                     | 0.67 (-0.02, 1.63)      | 3.34   | -0.35 (-0.61, 0.30)     | 2.39   | 0.0099** | 0.57 |
| ANT <sup>a</sup> Total <sup>^</sup>                      | 48.00 (48.00, 49.00)    | 5.00   | 47.00 (45.00, 49.00)    | 9.00   | 0.29     | 0.23 |
| ANT <sup>a</sup> Latency <sup>^a</sup>                   | 64.00 (59.50, 69.00)    | 23.00  | 84.00 (68.50, 92.00)    | 60.00  | 0.02*    | 0.53 |
| ANT <sup>a</sup> TOT States <sup>^a</sup>                | 11.50 (9.00, 14.50)     | 18.00  | 21.00 (13.00, 27.00)    | 29.00  | 0.03*    | 0.47 |
| ANT <sup>a</sup> Proportion TOT <sup>^a</sup>            | 0.23 (0.18, 0.29)       | 0.36   | 0.42 (0.26, 0.54)       | 0.58   | 0.03*    | 0.47 |
| WFD Frequency Rating <sup>^a</sup>                       | 2.50 (1.25, 3.00)       | 3.00   | 3.00 (3.00, 4.00)       | 5.00   | 0.04*    | 0.45 |
| WFD Distress Rating <sup>^</sup>                         | 1.00 (1.00, 1.75)       | 3.00   | 4.00 (3.00, 6.00)       | 6.00   | 0.0006** | 0.74 |
| VGT <sup>a</sup> Correct Dominant <sup>^</sup>           | 36.50 (34.25, 42.75)    | 20.00  | 36.00 (32.00, 38.00)    | 22.00  | 0.34     | 0.21 |
| VGT <sup>a</sup> Correct Other <sup>^</sup>              | 18.00 (15.00, 21.00)    | 15.00  | 19.00 (17.00, 21.25)    | 14.00  | 0.46     | 0.17 |
| VGT <sup>a</sup> Latency <sup>^</sup>                    | 184.50 (164.25, 196.75) | 125.00 | 213.00 (183.50, 308.00) | 323.00 | 0.03*    | 0.48 |
| HADS <sup>a</sup> Anxiety <sup>^a</sup>                  | 7.00 (5.25, 8.50)       | 10.00  | 7.00 (6.50, 8.50)       | 10.00  | 0.58     | 0.12 |
| HADS <sup>a</sup> Depression <sup>^</sup>                | 2.00 (1.00, 3.00)       | 9.00   | 4.00 (4.00, 5.50)       | 16.00  | 0.022*   | 0.50 |

Note. TLE = Temporal Lobe Epilepsy; TOPF = Test of Premorbid Functioning; WASI-II = Wechsler Abbreviated Scale of Intelligence, Second Edition; FSIQ = Full Scale Intelligence Quotient; WAIS-IV = Wechsler Adult Intelligence Scale, Fourth Edition; WMS-IV = Wechsler Memory Scale, Fourth Edition; RAVLT = Rey Auditory Verbal Learning Test; WMS-R = Wechsler Memory Scale-Revised; BNT = Boston Naming Test; TOT = Tip-of-the-tongue; OLR (COWAT) = Orthographic Lexical Retrieval (Controlled Oral Word Association Test); WFD = Word Finding Difficulty; VGT = Verb Generation Task; ANT = Auditory Naming Task; HADS = Hospital Anxiety and Depression Scale. Represented as z-scores where normative data was available, raw data are indicated by<sup>^</sup>. Latencies are expressed in seconds. Group differences computed using Mann-Whitney U test, effect sizes r, where \* = p <.05, \*\* = p <.01. <sup>a</sup>Suggests that data does not violate assumptions of normality on Shapiro-Wilk.

1  
2  
3  
4  
5  
6  
7  
8  
9  
10  
11  
12  
13  
14  
15  
16  
17  
18  
19  
20  
21  
22

**Table 2**

*Group differences on discourse variables across trials*

| Discourse Measure                               | Trial 1                |                 | Trial 2               |                | Trial 3                |                 | Trial 4                |                 | Trial 5                |                 |
|-------------------------------------------------|------------------------|-----------------|-----------------------|----------------|------------------------|-----------------|------------------------|-----------------|------------------------|-----------------|
|                                                 | MD [95% CI]            | <i>p</i> [RBC]  | MD [95% CI]           | <i>p</i> [RBC] | MD [95% CI]            | <i>p</i> [RBC]  | MD [95% CI]            | <i>p</i> [RBC]  | MD [95% CI]            | <i>p</i> [RBC]  |
| Sample length                                   | 3.91 [-52.00, 60.00]   | 0.97 [0.01]     | -4.00 [-52.00, 38.00] | 0.86 [0.04]    | -18.00 [-68.00, 24.00] | 0.36 [0.20]     | -29.80 [-102.00, 6.00] | 0.10 [0.36]     | -30.35 [-96.00, 14.00] | 0.19 [0.29]     |
| Spontaneous duration                            | -13.76 [-46.02, 16.17] | 0.26 [0.25]     | -13.23 [-35.92, 6.85] | 0.16 [0.31]    | -15.99 [-40.87, 2.24]  | 0.10 [0.36]     | -21.58 [-44.29, 0.95]  | 0.057 [0.42]    | -24.47 [-44.49, -2.98] | 0.018 [0.51]*†  |
| Pause duration                                  | -10.40 [-28.28, -0.63] | 0.033 [0.47]*   | -6.89 [-15.99, -1.55] | 0.01 [0.53]*   | -9.53 [-21.93, -3.55]  | 0.001 [0.68]*†  | -7.90 [-23.33, -2.51]  | 0.0060 [0.59]*  | -10.99 [-18.46, -6.65] | 0.0001 [0.78]*† |
| Duration (excluding pauses)                     | -2.83 [-19.80, 15.36]  | 0.88 [0.04]     | -4.71 [-19.26, 9.42]  | 0.51 [0.15]    | -5.96 [-22.02, 5.88]   | 0.39 [0.19]     | -8.42 [-25.84, 5.19]   | 0.19 [0.30]     | -11.30 [-28.32, 2.64]  | 0.10 [0.36]     |
| Production rate (words/second)                  | 0.42 [0.12, 0.72]      | 0.011 [0.56]*†  | 0.28 [0.00, 0.61]     | 0.049 [0.43]*  | 0.43 [0.08, 0.68]      | 0.013 [0.55]*†  | 0.26 [-0.04, 0.52]     | 0.097 [0.37]    | 0.42 [0.12, 0.67]      | 0.0049 [0.62]*† |
| Total statements                                | -1.00 [-9.00, 7.00]    | 0.78 [0.07]     | -2.00 [-7.00, 5.00]   | 0.60 [0.12]    | -4.00 [-12.00, 2.00]   | 0.22 [0.27]     | -4.00 [-15.00, 1.00]   | 0.16 [0.31]     | -6.43 [-14.00, -0.00]  | 0.044 [0.44]*   |
| Fluency disruptors <sup>^</sup>                 | -0.09 [-0.15, -0.03]   | 0.006 [0.60]*†  | -0.06 [-0.13, -0.00]  | 0.042 [0.45]*  | -0.08 [-0.14, -0.02]   | 0.009 [0.57]*†  | -0.07 [-0.12, -0.02]   | 0.015 [0.53]*   | -0.06 [-0.11, -0.01]   | 0.018 [0.52]*†  |
| Clarity disruptors <sup>^</sup>                 | 0.01 [-0.01, 0.02]     | 0.40 [0.19]     | 0.00 [-0.01, 0.01]    | 0.76 [0.07]    | 0.00 [-0.01, 0.01]     | 0.48 [0.15]     | 0.00 [-0.01, 0.01]     | 0.99 [0.00]     | -0.00 [-0.01, 0.01]    | 0.64 [0.10]     |
| False starts <sup>^</sup>                       | -0.01 [-0.03, 0.02]    | 0.44 [0.17]     | -0.00 [-0.05, 0.01]   | 0.61 [0.11]    | -0.00 [-0.03, 0.02]    | 0.83 [0.05]     | -0.01 [-0.04, 0.01]    | 0.33 [0.21]     | 0.01 [-0.00, 0.03]     | 0.14 [0.32]     |
| Fillers (non-grammatical) <sup>^</sup>          | -0.00 [-0.01, 0.01]    | 0.51 [0.14]     | -0.00 [-0.01, 0.01]   | 0.96 [0.01]    | -0.01 [-0.02, 0.01]    | 0.40 [0.19]     | 0.00 [-0.01, 0.02]     | 0.77 [0.07]     | 0.01 [-0.00, 0.01]     | 0.20 [0.27]     |
| Pauses (non-grammatical) <sup>^</sup>           | -0.05 [-0.08, -0.03]   | 0.0006 [0.75]*† | -0.03 [-0.06, -0.01]  | 0.018 [0.52]*  | -0.05 [-0.07, -0.02]   | 0.0008 [0.73]*† | -0.03 [-0.06, -0.00]   | 0.035 [0.46]*   | -0.05 [-0.07, -0.02]   | 0.004 [0.63]*†  |
| Hesitations (non-grammatical) <sup>^</sup>      | -0.06 [-0.11, -0.03]   | 0.0023 [0.67]*† | -0.04 [-0.07, -0.01]  | 0.032 [0.47]*  | -0.06 [-0.09, -0.02]   | 0.0009 [0.72]*† | -0.04 [-0.06, -0.00]   | 0.049 [0.42]*   | -0.04 [-0.08, -0.01]   | 0.013 [0.54]*†  |
| Non-grammatical hesitations to all <sup>^</sup> | -0.10 [-0.19, -0.02]   | 0.024 [0.50]*   | -0.02 [-0.14, 0.08]   | 0.66 [0.10]    | -0.08 [-0.21, 0.03]    | 0.13 [0.33]     | -0.05 [-0.13, 0.07]    | 0.35 [0.21]     | -0.06 [-0.18, 0.05]    | 0.24 [0.26]     |
| Other referents <sup>^</sup>                    | -0.01 [-0.02, -0.00]   | 0.027 [0.47]*   | -0.02 [-0.03, -0.00]  | 0.0082 [0.57]* | -0.02 [-0.04, -0.01]   | 0.0049 [0.61]*† | -0.00 [-0.02, 0.01]    | 0.38 [0.19]     | -0.01 [-0.02, -0.00]   | 0.021 [0.49]*†  |
| Disrupted Cohesion                              | -7.00 [-11.00, -1.00]  | 0.0059 [0.60]*† | -3.00 [-8.00, -1.00]  | 0.0057 [0.60]* | -3.00 [-6.00, -1.00]   | 0.0085 [0.58]*† | -3.00 [-6.00, -1.00]   | 0.021 [0.50]*   | -4.00 [-8.00, -1.00]   | 0.0028 [0.65]*† |
| Core Propositions                               | 1.20 [-2.00, 4.00]     | 0.50 [0.15]     | 1.00 [-1.00, 4.00]    | 0.29 [0.23]    | 1.00 [-1.00, 3.00]     | 0.34 [0.21]     | -0.00 [-3.00, 3.00]    | 0.99 [0.00]     | 1.00 [-2.00, 3.00]     | 0.74 [0.08]     |
| Task-on novel units <sup>#</sup>                | 0.14 [0.03, 0.25]      | 0.025 [0.50]*   | 0.07 [-0.04, 0.20]    | 0.11 [0.35]    | 0.10 [0.01, 0.19]      | 0.040 [0.45]*   | 0.13 [0.03, 0.24]      | 0.0063 [0.60]*  | 0.17 [0.08, 0.25]      | 0.0011 [0.72]*† |
| Non-progression units <sup>#</sup>              | -0.11 [-0.23, 0.01]    | 0.060 [0.41]    | -0.07 [-0.20, 0.07]   | 0.24 [0.26]    | -0.10 [-0.20, 0.00]    | 0.043 [0.42]*   | -0.14 [-0.24, -0.03]   | 0.0063 [0.60]*† | -0.17 [-0.25, -0.09]   | 0.0001 [0.83]*† |
| Non-progression to task-on novel units          | -0.26 [-0.60, -0.01]   | 0.040 [0.45]*   | -0.10 [-0.39, 0.09]   | 0.23 [0.27]    | -0.17 [-0.36, 0.01]    | 0.049 [0.41]*   | -0.24 [-0.45, -0.05]   | 0.0063 [0.60]*† | -0.30 [-0.51, -0.15]   | 0.0002 [0.82]*† |
| Syntactic Simplicity <sup>^</sup>               | -0.01 [-0.04, 0.01]    | 0.21 [0.28]     | -0.01 [-0.05, 0.02]   | 0.47 [0.16]    | -0.01 [-0.04, 0.00]    | 0.059 [0.41]    | 0.01 [-0.01, 0.03]     | 0.29 [0.23]     | -0.01 [-0.04, 0.01]    | 0.37 [0.20]     |

*Note.* TLE = Temporal Lobe Epilepsy; MD = Mean Difference where Control – TLE, CI = Confidence Interval. Metrics marked <sup>^</sup> are expressed relative to sample length, <sup>#</sup> are expressed relative to total statements. Group differences computed using Mann-Whitney U test, effect sizes expressed as Rank Biserial Correlation, where \* = *p* < .05, † = significance holds on false detection rate (FDR) correction.
